# Supplementary material for: Influence of F-position and solvent on coordination geometry and single ion magnet behavior of Co(ii) complexes
Source: Royal Society of Chemistry journal article supplement (doi:10.1039/d1dt02148f), 2021-01-01
Supplement: d1dt02148f1.pdf [file d1dt02148f1.pdf]

Supporting information for

**Influence of F-position and solvent on coordination geometry  
and single ion magnet behavior of Co(II) complexes**

Yue Chen,<sup>a</sup> Qi Yang,<sup>a</sup> Guo Peng,<sup>\*a</sup> Yi-Quan Zhang<sup>\*b</sup> and Xiao-Ming Ren<sup>\*a</sup>

<sup>a</sup>School of Chemistry and Molecular Engineering, Nanjing Tech University, Nanjing

211816, P. R. China

E-mail: guopeng@njtech.edu.cn, xmren@njtech.edu.cn

<sup>b</sup>Jiangsu Key Laboratory for NSLSCS, School of Physical Science and Technology,

Nanjing Normal University, Nanjing 210023, P. R. China

E-mail: zhangyiquan@njnu.edu.cn

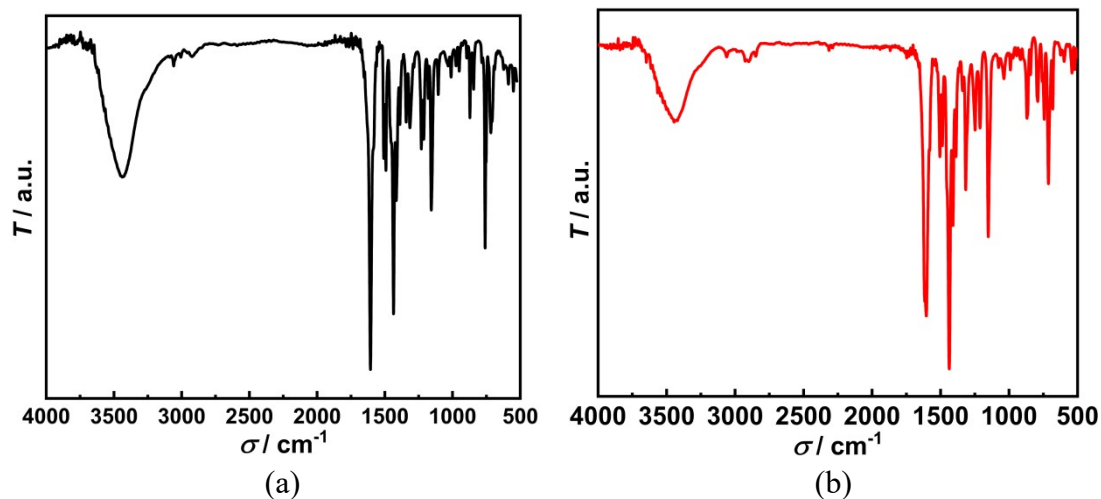

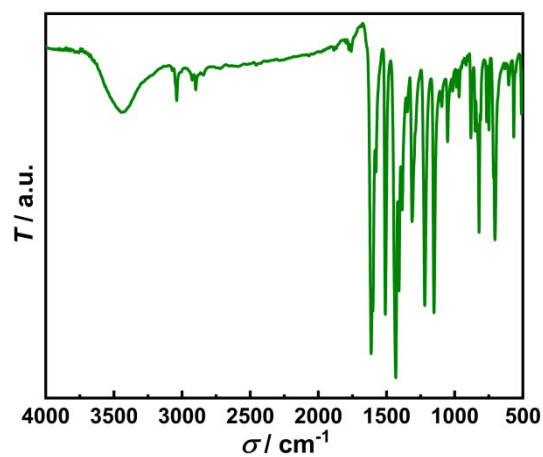

(c)

**Fig. S1** IR spectra of complexes **1** (a), **2** (b) and **3** (c).

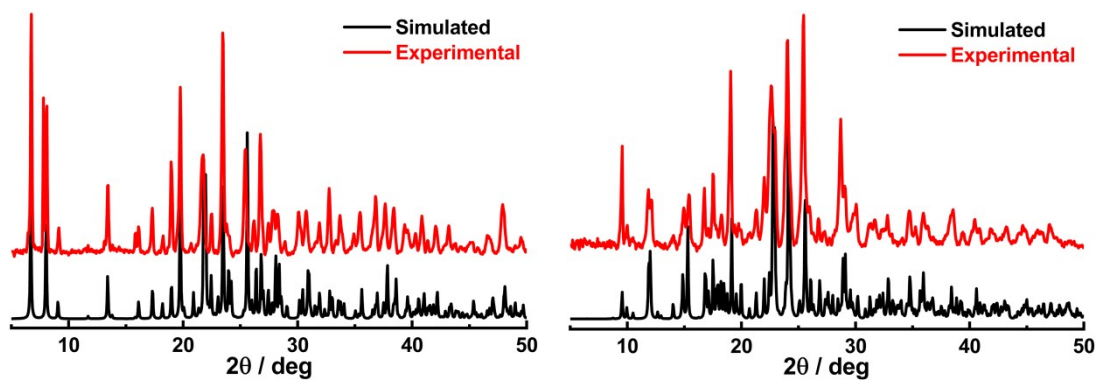

(b)

(a)

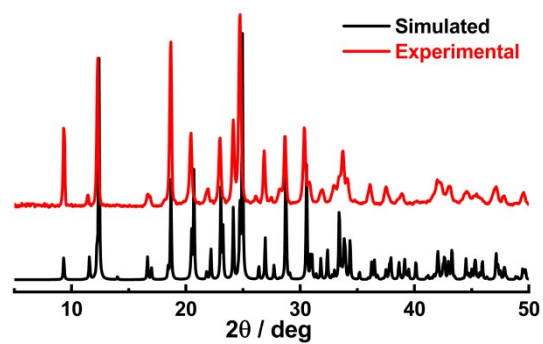

(c)

**Fig. S2** Measured (red) and simulated (black) PXRD patterns of complexes **1** (a), **2** (b) and **3** (c).

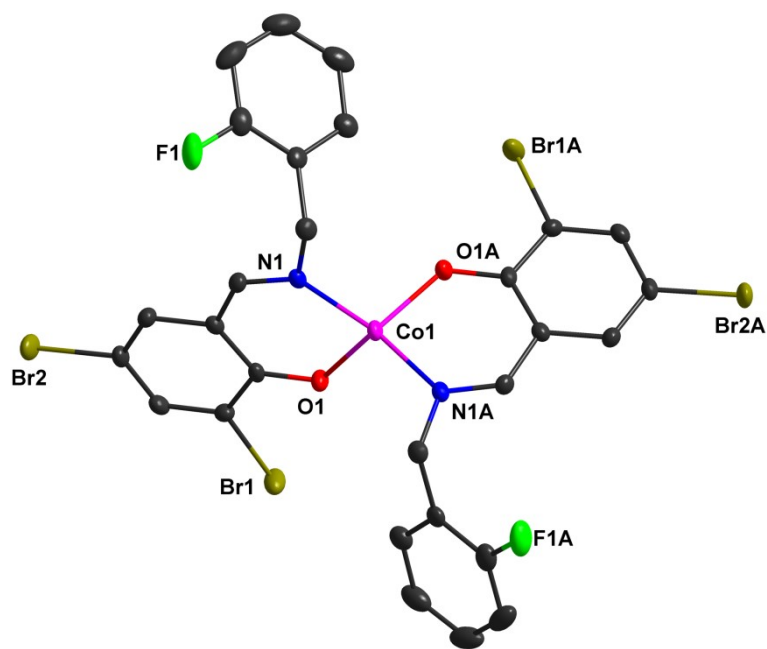

(a)

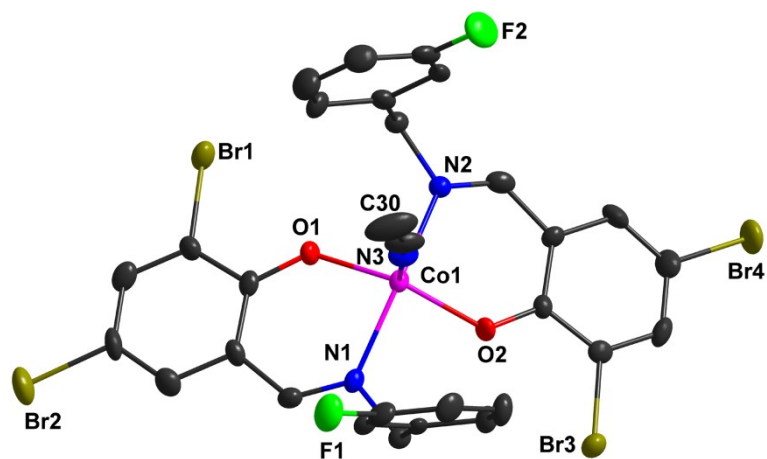

(b)

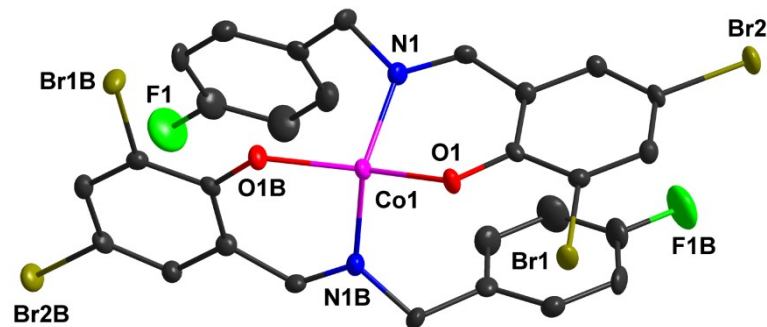

(c)

**Fig. S3** ORTEP views of complexes **1-3** (a-c) with displacement ellipsoids drawn at the 50% probability level. C30 in the structure of **2** (b) is severely disordered and was split by OLEX 2. <sup>S1</sup> Symmetric codes: A 1.5-x, y, 0.5-z; B 1-x, y, -z.

**Table S1** Continuous shape measures (CShM) for complexes **1-3**

|                                                                                                                                                                                                                                                   | 1            | 3            |         | 2            |
|---------------------------------------------------------------------------------------------------------------------------------------------------------------------------------------------------------------------------------------------------|--------------|--------------|---------|--------------|
| SP-4                                                                                                                                                                                                                                              | 20.549       | 15.971       | PP-5    | 32.996       |
| T-4                                                                                                                                                                                                                                               | <b>3.065</b> | 4.754        | vOC-5   | 2.889        |
| SS-4                                                                                                                                                                                                                                              | 4.945        | <b>3.764</b> | TBPY-5  | <b>1.535</b> |
| vTBPY-4                                                                                                                                                                                                                                           | 5.759        | 7.252        | SPY-5   | <b>1.536</b> |
|                                                                                                                                                                                                                                                   |              |              | JTBPY-5 | 3.305        |
| SP-4 = Square, T-4 = Tetrahedron, SS-4 = Seesaw,<br>vTBPY-4 = Vacant trigonal bipyramid<br>PP-5 = Pentagon, vOC-5 = Vacant octahedron, TBPY-5 = Trigonal bipyramid,<br>SPY-5 = Spherical square pyramid, JTBPY-5 = Johnson trigonal bipyramid J12 |              |              |         |              |

**Table S2** Selected bond lengths (Å) and angles (°) for complexes **1-3**

| <b>1</b>          |            |                     |            |
|-------------------|------------|---------------------|------------|
| Co(1)-O(1)#1      | 1.9235(17) | Co(1)-O(1)          | 1.9236(17) |
| Co(1)-N(1)#1      | 2.002(2)   | Co(1)-N(1)          | 2.002(2)   |
| O(1)#1-Co(1)-O(1) | 122.81(11) | O(1)#1-Co(1)-N(1)#1 | 93.15(8)   |
| O(1)-Co(1)-N(1)#1 | 109.86(8)  | O(1)#1-Co(1)-N(1)   | 109.86(8)  |
| O(1)-Co(1)-N(1)   | 93.15(8)   | N(1)#1-Co(1)-N(1)   | 131.31(12) |
| <b>2</b>          |            |                     |            |
| Co(1)-O(2)        | 1.955(4)   | Co(1)-O(1)          | 1.957(4)   |
| Co(1)-N(3)        | 2.049(5)   | Co(1)-N(2)          | 2.111(4)   |
| Co(1)-N(1)        | 2.125(5)   | O(2)-Co(1)-O(1)     | 139.09(16) |
| O(2)-Co(1)-N(3)   | 109.45(17) | O(1)-Co(1)-N(3)     | 111.42(17) |
| O(2)-Co(1)-N(2)   | 89.67(16)  | O(1)-Co(1)-N(2)     | 86.34(16)  |
| N(3)-Co(1)-N(2)   | 97.99(17)  | O(2)-Co(1)-N(1)     | 88.16(16)  |
| O(1)-Co(1)-N(1)   | 88.20(16)  | N(3)-Co(1)-N(1)     | 92.97(18)  |
| N(2)-Co(1)-N(1)   | 168.93(16) |                     |            |
| <b>3</b>          |            |                     |            |
| Co(1)-O(1)#2      | 1.936(4)   | Co(1)-O(1)          | 1.936(4)   |
| Co(1)-N(1)#2      | 2.021(5)   | Co(1)-N(1)          | 2.021(5)   |
| O(1)#2-Co(1)-O(1) | 144.3(3)   | O(1)#2-Co(1)-N(1)#2 | 93.10(19)  |

|                                                      |            |                   |            |
|------------------------------------------------------|------------|-------------------|------------|
| O(1)-Co(1)-N(1)#2                                    | 103.72(19) | O(1)#2-Co(1)-N(1) | 103.72(19) |
| O(1)-Co(1)-N(1)                                      | 93.10(19)  | N(1)#2-Co(1)-N(1) | 123.3(3)   |
| Symmetry codes: #1 -x+3/2, y, -z+1/2; #2 -x+1, y, -z |            |                   |            |

**Table S3** Zero field splitting parameters for complexes **1-3** extracted from magnetic data and theoretic calculations.

|                       |          | $D / \text{cm}^{-1}$ | $E / \text{cm}^{-1}$ | $g_x$                    | $g_y$ | $g_z$ | $\text{TIP} \times 10^5 / \text{cm}^3 \text{mol}^{-1}$ |
|-----------------------|----------|----------------------|----------------------|--------------------------|-------|-------|--------------------------------------------------------|
| Experimental          | <b>1</b> | -27.5                | -2.2                 | 2.038                    | 2.038 | 2.685 | 66.7                                                   |
|                       | <b>2</b> | -50.9                | 17.3                 | 2.133                    | 2.133 | 2.573 | -                                                      |
|                       | <b>3</b> | -36.9                | 7.0                  | $g_{\text{iso}} = 2.297$ |       |       | 76.1                                                   |
| Theoretic<br>(CASPT2) | <b>1</b> | -36.5                | 2.7                  | 2.103                    | 2.180 | 2.595 | -                                                      |
|                       | <b>2</b> | -41.3                | 12.5                 | 1.995                    | 2.221 | 2.504 | -                                                      |
|                       | <b>3</b> | -43.7                | 9.5                  | 2.064                    | 2.320 | 2.710 | -                                                      |
| Theoretic<br>(NEVPT2) | <b>1</b> | -34.7                | -2.5                 | 2.103                    | 2.175 | 2.557 | -                                                      |
|                       | <b>2</b> | -44.3                | -14.2                | 1.990                    | 2.232 | 2.542 | -                                                      |
|                       | <b>3</b> | -46.8                | -7.7                 | 2.068                    | 2.286 | 2.700 | -                                                      |

**Table S4** Calculated spin-free energies ( $\text{cm}^{-1}$ ) of the lowest ten terms ( $S = 3/2$ ) of the  $\text{Co}^{\text{II}}$  ion of complexes **1-3** using CASPT2/RASSI-SO with MOLCAS 8.4.

| spin-free<br>states | <b>1</b>           | <b>2</b>           | <b>3</b>           |
|---------------------|--------------------|--------------------|--------------------|
|                     | $E/\text{cm}^{-1}$ | $E/\text{cm}^{-1}$ | $E/\text{cm}^{-1}$ |
| 1                   | 0.0                | 0.0                | 0.0                |
| 2                   | 1893.2             | 1969.8             | 1416.6             |
| 3                   | 5680.4             | 2400.4             | 2752.1             |
| 4                   | 7179.8             | 5186.2             | 4950.7             |
| 5                   | 7764.7             | 7453.4             | 5999.5             |
| 6                   | 9340.1             | 12273.6            | 10054.6            |
| 7                   | 9641.9             | 16890.8            | 10819.2            |
| 8                   | 18842.9            | 19328.3            | 17697.9            |

|    |         |         |         |
|----|---------|---------|---------|
| 9  | 21643.4 | 20683.4 | 20647.2 |
| 10 | 22628.5 | 24904.7 | 24369.5 |

**Table S5** Calculated weights of the five most important spin-orbit-free states for the lowest two spin-orbit states of complexes **1–3** using CASPT2/RASSI-SO with MOLCAS 8.4.

|          | Spin-orbit states | Energy (cm <sup>-1</sup> ) | Spin-free states, Spin, Weights |              |              |              |               |
|----------|-------------------|----------------------------|---------------------------------|--------------|--------------|--------------|---------------|
|          |                   |                            |                                 |              |              |              |               |
| <b>1</b> | 1                 | 0.0                        | 1,1.5,0.9404                    | 2,1.5,0.0548 | 3,1.5,0.0027 | 6,1.5,0.0006 | 4,1.5,0.0003  |
|          | 2                 | 73.6                       | 1,1.5,0.9836                    | 2,1.5,0.0075 | 3,1.5,0.0048 | 6,1.5,0.0022 | 17,0.5,0.0007 |
| <b>2</b> | 1                 | 0.0                        | 1,1.5,0.9610                    | 2,1.5,0.0234 | 4,1.5,0.0077 | 3,1.5,0.0037 | 5,1.5,0.0020  |
|          | 2                 | 93.3                       | 1,1.5,0.9863                    | 2,1.5,0.0050 | 3,1.5,0.0031 | 5,1.5,0.0027 | 4,1.5,0.0018  |
| <b>3</b> | 1                 | 0.0                        | 1,1.5,0.9073                    | 2,1.5,0.0771 | 3,1.5,0.0123 | 5,1.5,0.0010 | 4,1.5,0.0005  |
|          | 2                 | 93.4                       | 1,1.5,0.9665                    | 2,1.5,0.0156 | 3,1.5,0.0130 | 6,1.5,0.0020 | 5,1.5,0.0008  |

**Table S6** Calculated ZFS parameters  $D$ ,  $E$  (cm<sup>-1</sup>) and  $\mathbf{g}$  ( $g_x$ ,  $g_y$ ,  $g_z$ ) tensors of complexes **1–3** using CASPT2 and NEVPT2 with MOLCAS 8.4 and ORCA 4.2, respectively.

| complexes | CASPT2           |                  |       |       |       | NEVPT2           |                  |       |       |       |
|-----------|------------------|------------------|-------|-------|-------|------------------|------------------|-------|-------|-------|
|           | $D_{\text{cal}}$ | $E_{\text{cal}}$ | $g_x$ | $g_y$ | $g_z$ | $D_{\text{cal}}$ | $E_{\text{cal}}$ | $g_x$ | $g_y$ | $g_z$ |
| <b>1</b>  | -36.5            | 2.7              | 2.103 | 2.180 | 2.595 | -34.7            | -2.5             | 2.103 | 2.175 | 2.557 |
| <b>2</b>  | -41.3            | 12.5             | 1.995 | 2.221 | 2.504 | -44.3            | -14.2            | 1.990 | 2.232 | 2.542 |
| <b>3</b>  | -43.7            | 9.5              | 2.064 | 2.320 | 2.710 | -46.8            | -7.7             | 2.068 | 2.286 | 2.700 |

**Table S7** Contribution of the excited states (with relative energy  $E$ , cm<sup>-1</sup>) to  $D$  values (cm<sup>-1</sup>) for complexes **1–3** using NEVPT2 with ORCA 4.2.

| complexes | State No. | Mult | Energy, cm <sup>-1</sup> | Contribution, cm <sup>-1</sup> |
|-----------|-----------|------|--------------------------|--------------------------------|
|           |           |      |                          | $D$                            |
| <b>1</b>  | 1         | 4    | 1728.4                   | -51.3                          |
|           | 2         | 4    | 4651.6                   | 8.7                            |
|           | 4         | 4    | 7756.1                   | 5.8                            |
| <b>2</b>  | 1         | 4    | 1571.8                   | -13.5                          |

|          |   |   |        |       |
|----------|---|---|--------|-------|
|          | 3 | 4 | 3904.7 | -12.2 |
|          | 4 | 4 | 6388.6 | -8.2  |
| <b>3</b> | 1 | 4 | 1396.9 | -55.1 |
|          | 2 | 4 | 2406.6 | 3.9   |
|          | 5 | 4 | 8483.1 | 5.4   |

**Table S8** Relative energies (cm<sup>-1</sup>) of ligand field one-electron states (in the basis of d-AOs) of complexes **1–3** from AILFT analysis using NEVPT2 with ORCA 4.2.

| complexes | No. | LF one-electron state                                                 | Energy, cm <sup>-1</sup> |
|-----------|-----|-----------------------------------------------------------------------|--------------------------|
| <b>1</b>  | 1   | -0.95 d <sub>z2</sub> - 0.31 d <sub>x2-y2</sub>                       | 0.0                      |
|           | 2   | 0.90 d <sub>x2-y2</sub> - 0.31 d <sub>z2</sub> + 0.30 d <sub>xy</sub> | 1537.8                   |
|           | 3   | -1.0 d <sub>yz</sub>                                                  | 1694.6                   |
|           | 4   | 1.0 d <sub>xz</sub>                                                   | 5607.6                   |
|           | 5   | 0.95 d <sub>xy</sub> - 0.30 d <sub>x2-y2</sub>                        | 9215.8                   |
| <b>2</b>  | 1   | 0.99 d <sub>yz</sub>                                                  | 0.0                      |
|           | 2   | -0.99 d <sub>xz</sub>                                                 | 1482.5                   |
|           | 3   | 0.99 d <sub>xy</sub>                                                  | 2767.6                   |
|           | 4   | 0.91 d <sub>x2-y2</sub> + 0.39 d <sub>z2</sub>                        | 4715.0                   |
|           | 5   | 0.91 d <sub>z2</sub> - 0.40 d <sub>x2-y2</sub>                        | 11317.4                  |
| <b>3</b>  | 1   | -0.97 d <sub>z2</sub> - 0.25 d <sub>x2-y2</sub>                       | 0.0                      |
|           | 2   | 0.74 d <sub>yz</sub> - 0.68 d <sub>xz</sub>                           | 1852.5                   |
|           | 3   | -0.79 d <sub>xy</sub> - 0.59 d <sub>x2-y2</sub>                       | 2562.7                   |
|           | 4   | -0.74 d <sub>xz</sub> - 0.68 d <sub>yz</sub>                          | 4181.6                   |
|           | 5   | 0.77 d <sub>x2-y2</sub> - 0.61 d <sub>xy</sub>                        | 11253.6                  |

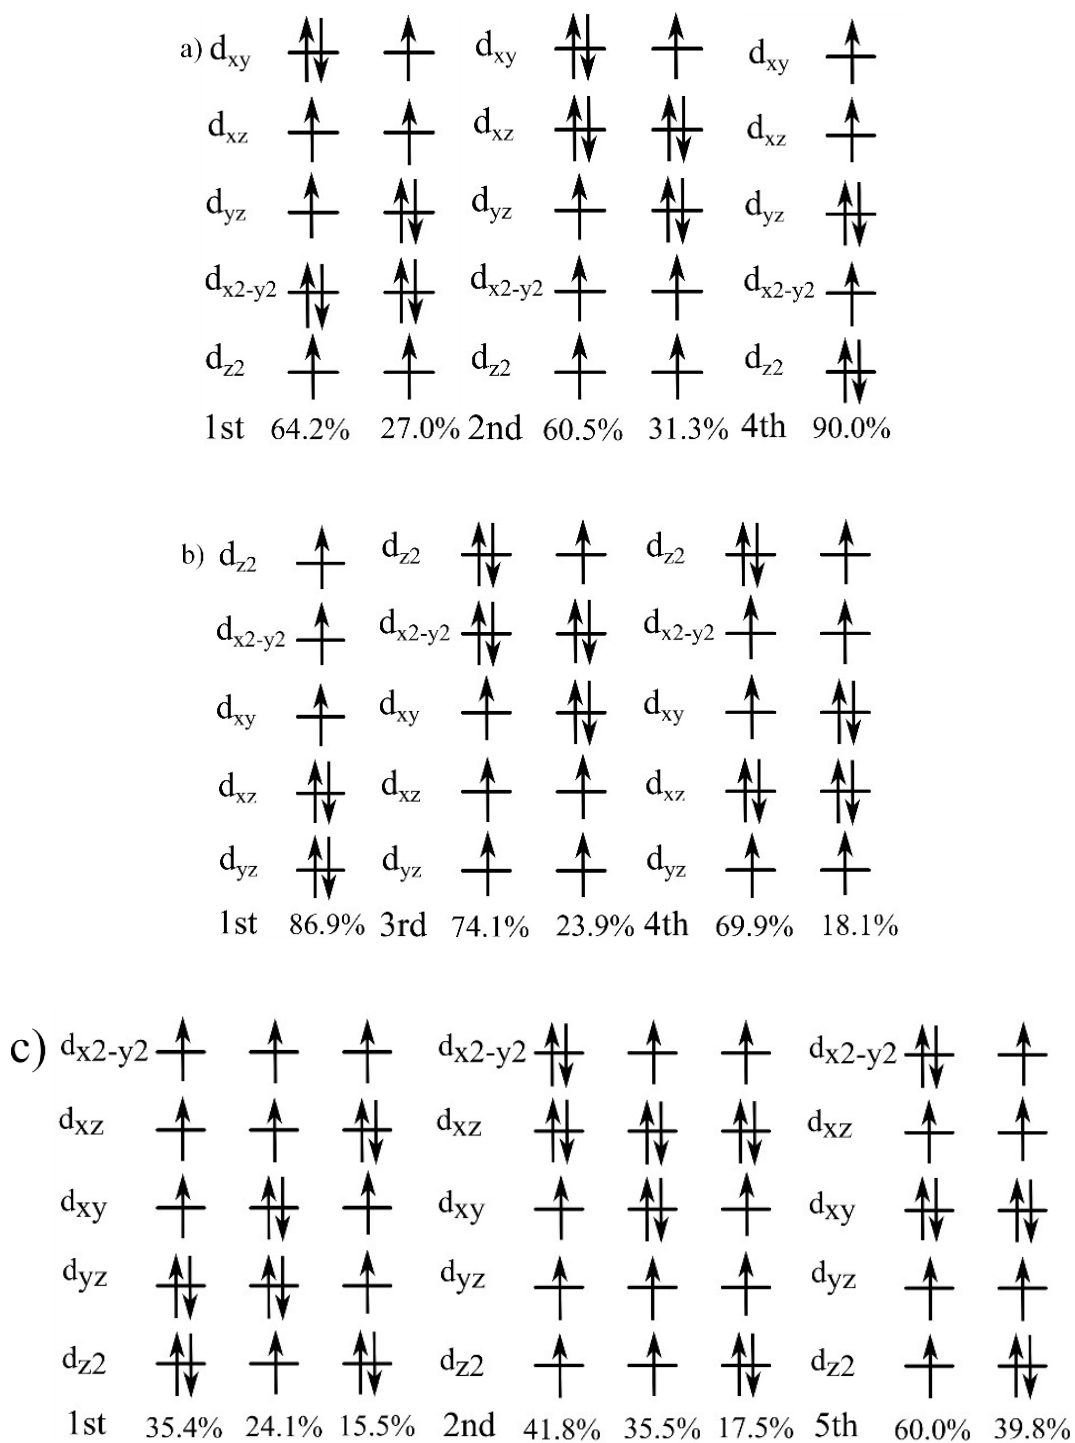

**Fig. S4** (a-c) Multi-determinant wavefunction of the selected excited states having important contributions to  $D$  tensor for complex 1–3. The computed CI coefficients that are larger than 10% are shown above.



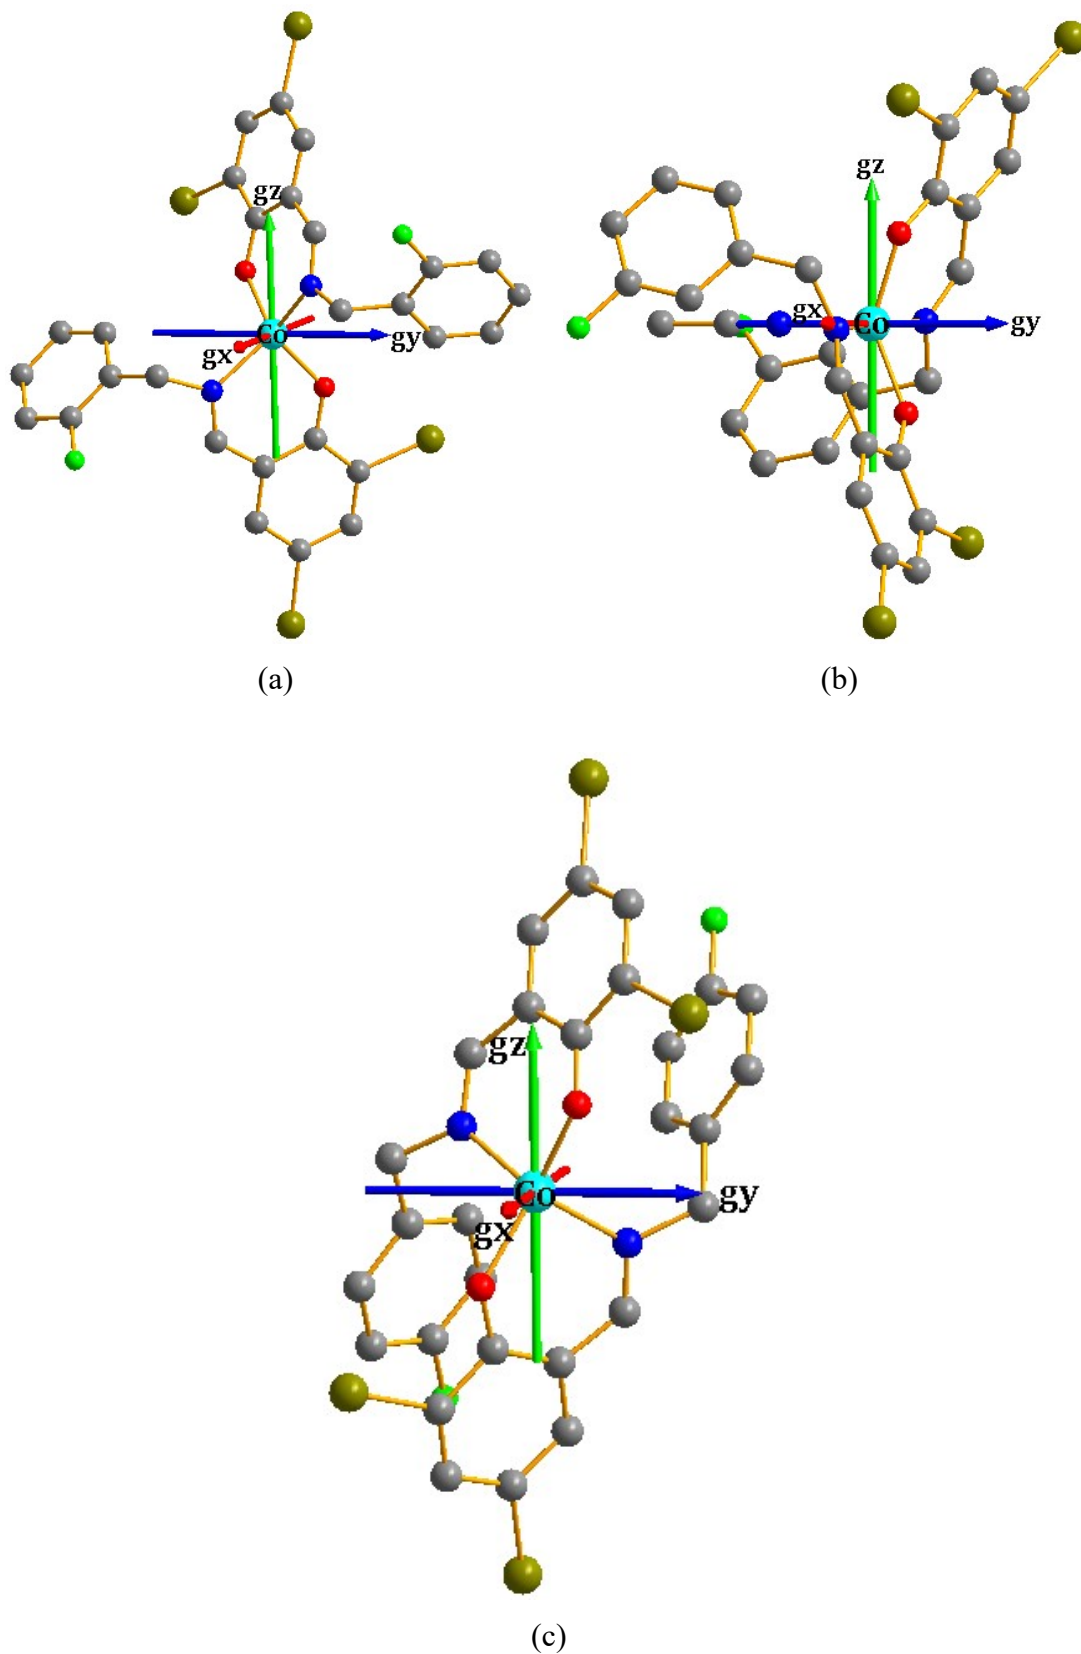

**Fig. S5** Orientations of the local magnetic axes (red:  $g_x$ ; blue:  $g_y$ ; green:  $g_z$ ) on Co(II) ions of **1–3** in their ground spin-orbit states.

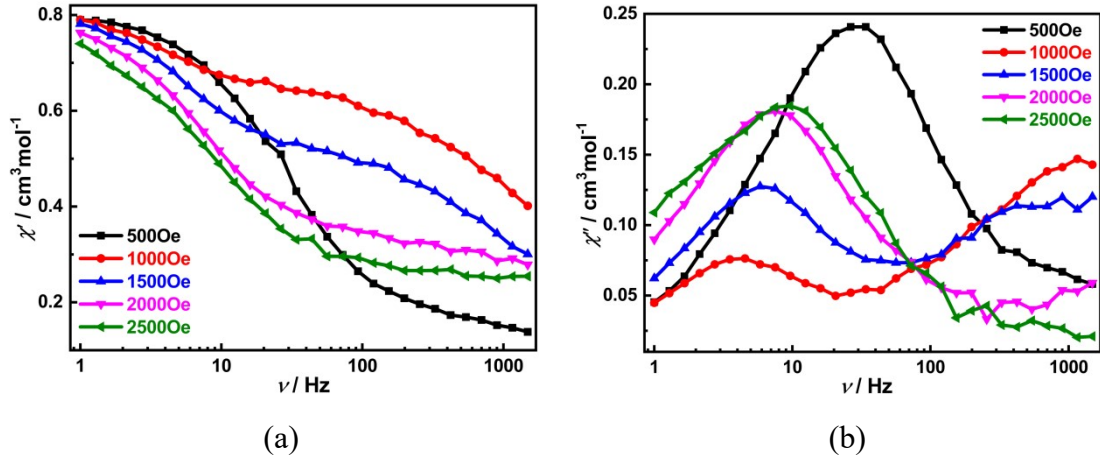

**Fig. S6** Frequency dependence of in-phase (a) and out-of-phase (b) ac susceptibility under various dc fields at 2 K for 1.

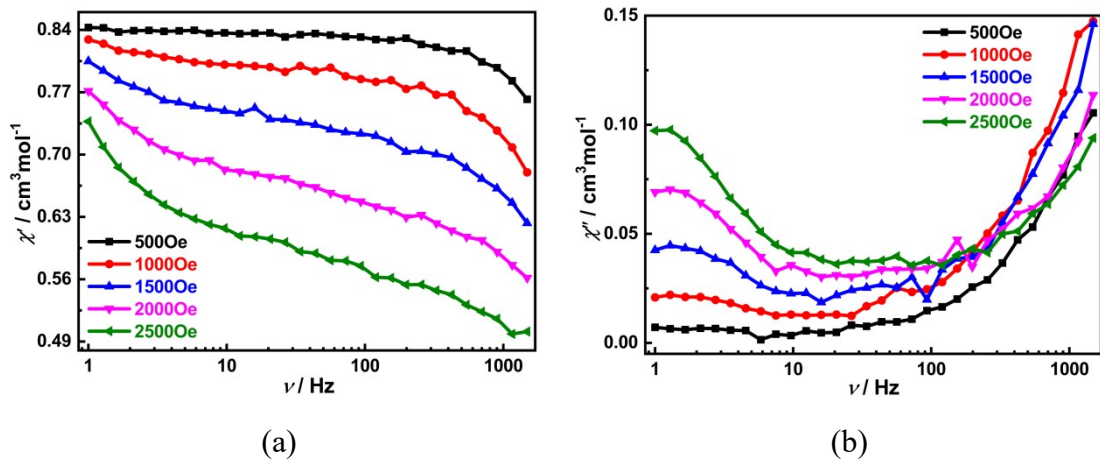

**Fig. S7** Frequency dependence of in-phase (a) and out-of-phase (b) ac susceptibility under various dc fields at 2 K for 2.

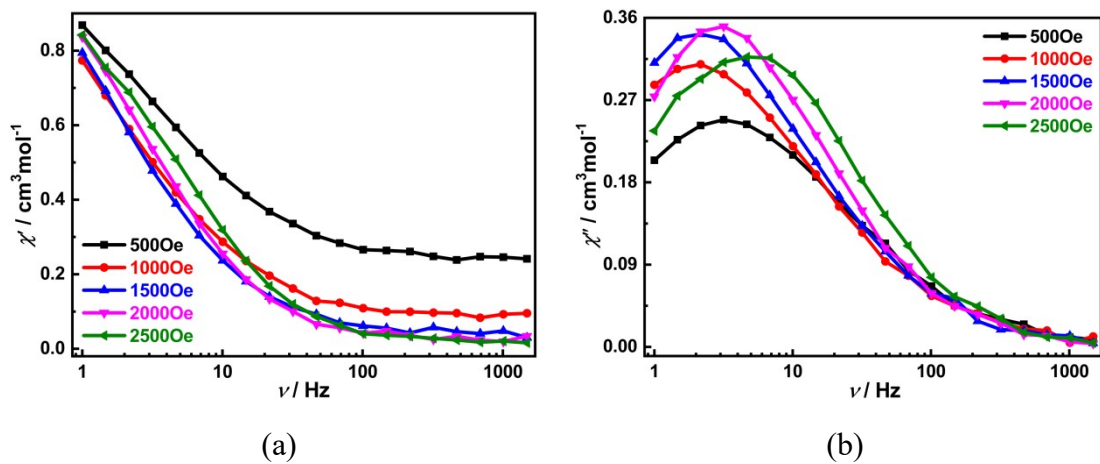

**Fig. S8** Frequency dependence of in-phase (a) and out-of-phase (b) ac susceptibility under various dc fields at 2 K for **3**.

**Table S9** Cole-Cole parameters of **1** at 1000 Oe dc field

| T / K | $\chi_s / \text{cm}^{-3}\text{mol}^{-1}$ | $\Delta\chi_1 / \text{cm}^{-3}\text{mol}^{-1}$ | $\tau_1 / \text{s}$ | $\alpha_1$ | $\Delta\chi_2 / \text{cm}^{-3}\text{mol}^{-1}$ | $\tau_2 / \text{s}$ | $\alpha_2$ | R        |
|-------|------------------------------------------|------------------------------------------------|---------------------|------------|------------------------------------------------|---------------------|------------|----------|
| 2     | 1.64E-01                                 | 5.20E-01                                       | 1.16E-04            | 3.71E-01   | 1.58E-01                                       | 4.52E-02            | 8.83E-02   | 3.40E-04 |
| 2.3   | 8.89E-02                                 | 5.22E-01                                       | 8.38E-05            | 3.96E-01   | 1.56E-01                                       | 3.21E-02            | 8.47E-02   | 1.25E-03 |
| 2.6   | 1.24E-07                                 | 5.65E-01                                       | 5.31E-05            | 4.86E-01   | 1.26E-01                                       | 1.89E-02            | 7.61E-15   | 4.90E-04 |
| 2.9   | 2.30E-07                                 | 5.07E-01                                       | 5.52E-05            | 4.56E-01   | 1.30E-01                                       | 9.20E-03            | 2.64E-15   | 4.30E-04 |
| 3.2   | 3.06E-07                                 | 4.51E-01                                       | 5.33E-05            | 4.22E-01   | 1.36E-01                                       | 4.16E-03            | 4.03E-15   | 4.19E-04 |
| 3.5   | 2.12E-08                                 | 3.92E-01                                       | 4.16E-05            | 3.78E-01   | 1.54E-01                                       | 1.90E-03            | 1.32E-14   | 1.04E-03 |
| 3.8   | 1.70E-08                                 | 3.39E-01                                       | 3.60E-05            | 3.25E-01   | 1.70E-01                                       | 9.95E-04            | 2.35E-14   | 4.22E-04 |
| 4.1   | 2.45E-08                                 | 2.97E-01                                       | 3.03E-05            | 2.82E-01   | 1.81E-01                                       | 5.70E-04            | 3.41E-14   | 6.65E-04 |
| 4.4   | 5.04E-08                                 | 2.67E-01                                       | 2.68E-05            | 2.72E-01   | 1.84E-01                                       | 3.39E-04            | 3.63E-14   | 3.09E-04 |
| 4.7   | 7.44E-08                                 | 2.46E-01                                       | 2.45E-05            | 2.00E-01   | 1.79E-01                                       | 2.28E-04            | 6.24E-14   | 5.22E-04 |

**Table S10** Cole-Cole parameters of **3** at 1500 Oe dc field

| T / K | $\chi_s / \text{cm}^{-3}\text{mol}^{-1}$ | $\chi_T / \text{cm}^{-3}\text{mol}^{-1}$ | $\tau / \text{s}$ | $\alpha$ | R        |
|-------|------------------------------------------|------------------------------------------|-------------------|----------|----------|
| 1.9   | 2.86E-02                                 | 1.29E+00                                 | 8.35E-02          | 2.77E-01 | 1.47E-03 |
| 2.2   | 2.36E-02                                 | 1.09E+00                                 | 5.89E-02          | 2.62E-01 | 1.35E-03 |
| 2.5   | 2.70E-02                                 | 9.37E-01                                 | 4.18E-02          | 2.29E-01 | 2.44E-03 |
| 2.8   | 2.85E-02                                 | 8.29E-01                                 | 2.84E-02          | 1.99E-01 | 1.75E-03 |
| 3.1   | 2.97E-02                                 | 7.32E-01                                 | 1.82E-02          | 1.54E-01 | 1.51E-03 |
| 3.4   | 3.01E-02                                 | 6.62E-01                                 | 1.11E-02          | 1.17E-01 | 1.87E-03 |
| 3.7   | 2.47E-02                                 | 6.03E-01                                 | 6.49E-03          | 8.45E-02 | 1.32E-03 |

|     |          |          |          |          |          |
|-----|----------|----------|----------|----------|----------|
| 4   | 3.02E-02 | 5.56E-01 | 3.86E-03 | 5.25E-02 | 1.12E-03 |
| 4.3 | 2.72E-02 | 5.19E-01 | 2.32E-03 | 4.15E-02 | 1.11E-03 |
| 4.6 | 2.64E-02 | 4.86E-01 | 1.42E-03 | 3.28E-02 | 7.07E-04 |
| 4.9 | 2.60E-02 | 4.58E-01 | 8.92E-04 | 3.11E-02 | 5.43E-04 |
| 5.2 | 2.15E-02 | 4.33E-01 | 5.68E-04 | 2.72E-02 | 6.59E-04 |
| 5.5 | 2.43E-02 | 4.10E-01 | 3.81E-04 | 1.94E-02 | 7.31E-04 |
| 5.8 | 1.95E-02 | 3.90E-01 | 2.46E-04 | 2.49E-02 | 1.15E-03 |
| 6.1 | 2.00E-02 | 3.72E-01 | 1.68E-04 | 3.29E-02 | 7.23E-04 |
| 6.4 | 6.14E-03 | 3.54E-01 | 1.15E-04 | 3.56E-02 | 5.31E-04 |
| 6.7 | 7.68E-06 | 3.40E-01 | 8.04E-05 | 3.80E-02 | 3.82E-04 |
| 7   | 2.74E-15 | 3.25E-01 | 5.87E-05 | 2.05E-02 | 5.71E-04 |
| 7.3 | 4.97E-15 | 3.13E-01 | 4.54E-05 | 1.01E-14 | 1.53E-03 |
| 7.6 | 7.88E-15 | 3.00E-01 | 3.17E-05 | 1.32E-14 | 4.84E-04 |

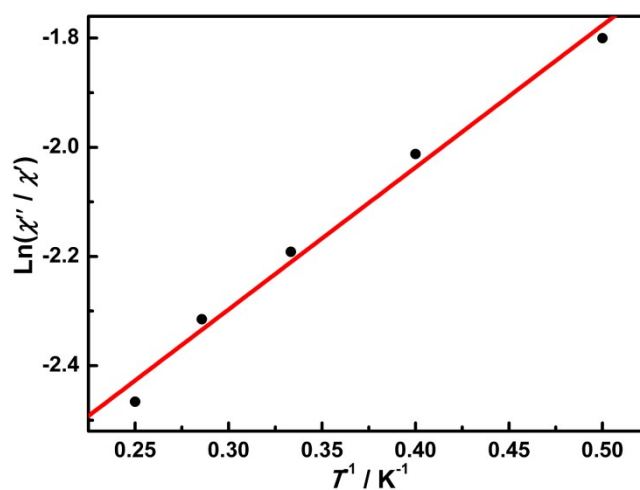

**Fig. S9**  $\text{Ln}(\chi''/\chi')$  versus  $T^{-1}$  plots of **2** at frequency of 901Hz. The solid line is the best-fit curve.

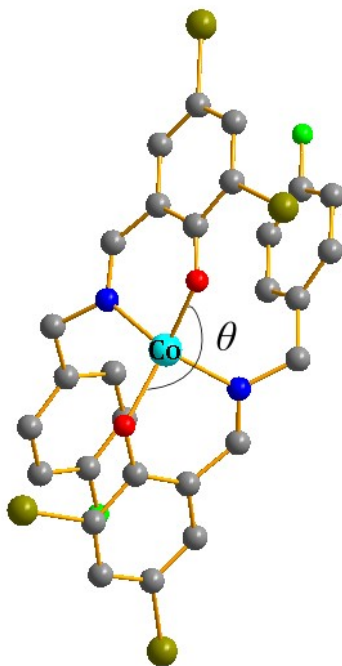

**Fig. S10** Included  $\theta$  angle between  $\text{Co}^{\text{II}}$  and O atoms.

**Table S11** Calculated ZFS parameters  $D$ ,  $E$  ( $\text{cm}^{-1}$ ) and  $\mathbf{g}$  ( $g_x, g_y, g_z$ ) tensors of complex **3** with the angle of O-Co-O ranging from 144 to 180 degrees using CASPT2/RASSI-SO with MOLCAS 8.4.

| $\theta$ | $D_{\text{cal}}$ | $E_{\text{cal}}$ | $g_x$ | $g_y$ | $g_z$ |
|----------|------------------|------------------|-------|-------|-------|
| 144°     | -43.7            | 9.5              | 2.064 | 2.320 | 2.710 |
| 150°     | -42.2            | 8.3              | 2.063 | 2.304 | 2.688 |
| 160°     | -45.4            | 8.4              | 2.054 | 2.311 | 2.710 |
| 170°     | -50.3            | 9.4              | 2.042 | 2.329 | 2.763 |
| 180°     | -60.1            | 11.0             | 2.024 | 2.347 | 2.873 |

**Table S12** Coordination environment and magnetic parameters of four coordinated  $\text{Co}(\text{II})$  complexes with both N and O donors.

| Compound                    | Donor set                | Geometry    | $D / \text{cm}^{-1}$ | $E / \text{cm}^{-1}$ | Dc field / Oe | $U_{\text{eff}} / \text{K}$ | Ref.      |
|-----------------------------|--------------------------|-------------|----------------------|----------------------|---------------|-----------------------------|-----------|
| 1                           | $\text{CoN}_2\text{O}_2$ | tetrahedron | -27.5                | -2.2                 | 1000          | 28.4                        | This work |
| 3                           | $\text{CoN}_2\text{O}_2$ | seesaw      | -36.9                | 7.0                  | 1500          | 48.9                        |           |
| $[\text{Co}(\text{L}_1)_2]$ | $\text{CoN}_2\text{O}_2$ | tetrahedron | -49.9                | 6.3                  | 2000          | 54.9                        | S2        |

|                                                                              |                                 |             |       |             |      |      |    |
|------------------------------------------------------------------------------|---------------------------------|-------------|-------|-------------|------|------|----|
| [Co(L <sup>1</sup> ) <sub>2</sub> ] $\cdot$ C <sub>2</sub> H <sub>5</sub> OH | CoN <sub>2</sub> O <sub>2</sub> | tetrahedron | -19.3 | -0.05       | 0    | 48   | S3 |
| [Co(L <sup>2</sup> ) <sub>2</sub> ] $\cdot$ C <sub>2</sub> H <sub>5</sub> OH | CoN <sub>2</sub> O <sub>2</sub> | tetrahedron | -19.2 | 1.2         | 0    | 42   |    |
| [Co(L <sup>1</sup> ) <sub>2</sub> ]                                          | CoN <sub>2</sub> O <sub>2</sub> | tetrahedron | -41   | /           | 400  | 49   | S4 |
|                                                                              |                                 |             |       |             | 1000 | 89   |    |
| [Co(L <sup>2</sup> ) <sub>2</sub> ]                                          | CoN <sub>2</sub> O <sub>2</sub> | tetrahedron | -35   | /           | /    | /    |    |
| [Co(L <sup>Br</sup> ) <sub>2</sub> ]                                         | CoN <sub>2</sub> O <sub>2</sub> | tetrahedron | -36.7 | /           | 400  | 52   | S5 |
| [Co(L <sup>Ph</sup> ) <sub>2</sub> ] $\cdot$ CH <sub>2</sub> Cl <sub>2</sub> | CoN <sub>2</sub> O <sub>2</sub> | tetrahedron | -39.8 | /           | 400  | 62   |    |
| Co(hpbdti) <sub>2</sub> $\cdot$ 3CH <sub>3</sub><br>OH                       | CoN <sub>2</sub> O <sub>2</sub> | tetrahedron | /     | /           | 2000 | 56.7 | S6 |
| Co(BrL) <sub>2</sub> $\cdot$ 3CH <sub>3</sub> OH                             | CoN <sub>2</sub> O <sub>2</sub> | tetrahedron | -44   | $\leq 0.01$ | 2000 | 18.4 | S7 |
| Co(PL) <sub>2</sub> $\cdot$ 2CH <sub>3</sub> OH                              | CoN <sub>2</sub> O <sub>2</sub> | tetrahedron | -50   | $\leq 0.01$ | 400  | 50.4 |    |
| [Co(L <sup>Sal,2-Ph</sup> ) <sub>2</sub> ]                                   | CoN <sub>2</sub> O <sub>2</sub> | tetrahedron | -25.1 | /           | 400  | 48   | S8 |
| [Co(L <sup>Nph,2-Ph</sup> ) <sub>2</sub> ]                                   | CoN <sub>2</sub> O <sub>2</sub> | tetrahedron | -31.4 | /           | 400  | 76   |    |
| [Co(Himl) <sub>2</sub> ] $\cdot$ CH <sub>3</sub> O<br>H                      | CoN <sub>2</sub> O <sub>2</sub> | tetrahedron | -42   | /           | 1400 | /    | S9 |
| [Co(Himn) <sub>2</sub> ]                                                     | CoN <sub>2</sub> O <sub>2</sub> | tetrahedron | -38   | /           | 0    | /    |    |
| [Co(Hthp) <sub>2</sub> ]                                                     | CoN <sub>2</sub> O <sub>2</sub> | tetrahedron | -35   | /           | 0    | 89   |    |

**Table S13** Coordination environment and magnetic parameters of five coordinated Co(II) complexes with intermediate coordination geometry in between trigonal bipyramid and square pyramid.

| Compound                                                             | Donor set                        | Addison parameter ( $\tau$ ) | $D / \text{cm}^{-1}$ | $E / D$ | Dc field / Oe | $U_{\text{eff}} / \text{K}$ | Ref.      |
|----------------------------------------------------------------------|----------------------------------|------------------------------|----------------------|---------|---------------|-----------------------------|-----------|
| 2                                                                    | CoN <sub>3</sub> O <sub>2</sub>  | 0.497                        | -50.9                | 0.334   | 1000          | 2.6                         | This work |
| [CoCl <sub>2</sub> L <sup>C12</sup> ] <sub><math>\infty</math></sub> | CoN <sub>3</sub> Cl <sub>2</sub> | 0.41                         | 46.8                 | /       | 2000          | 40.5                        | S10       |
| [Co(terpy)(NCS) <sub>2</sub> ]                                       | CoN <sub>5</sub>                 | 0.43                         | /                    | /       | 5600          | 17                          | S11       |
| [Co(L3A)Cl <sub>2</sub> ]                                            | CoN <sub>3</sub> Cl <sub>2</sub> | 0.38                         | 45.7                 | 0.24    | /             | /                           | S12       |

|                                                                             |                                   |      |       |       |           |           |     |
|-----------------------------------------------------------------------------|-----------------------------------|------|-------|-------|-----------|-----------|-----|
| [Co(pypz)(NCO) <sub>2</sub> ]                                               | CoN <sub>5</sub>                  | 0.46 | 30    | /     | 2000      | 25.3      | S13 |
| [Co(dpt)(NCS) <sub>2</sub> ]                                                | CoN <sub>5</sub>                  | 0.46 | 36.2  | 0.33  | 3000      | /         | S14 |
| [Co(L)Cl <sub>2</sub> ]                                                     | CoN <sub>3</sub> Cl <sub>2</sub>  | 0.46 | 26    | 0.333 | 1500      | 18.9      | S15 |
| [Co(L)Br <sub>2</sub> ]                                                     | CoN <sub>3</sub> Br <sub>2</sub>  | 0.41 | 39.2  | 0.333 | 500/1250  | 19.1/20.1 | S15 |
| [Co(phen)(DMSO)Cl <sub>2</sub> ]                                            | CoN <sub>2</sub> OCl <sub>2</sub> | 0.54 | -17   | 0.24  | 1000      | 40.3      | S16 |
| [Co(dmbpy) <sub>2</sub> (H <sub>2</sub> O)](ClO <sub>4</sub> ) <sub>2</sub> | CoN <sub>4</sub> O                | 0.44 | 35.8  | /     | 1000/2500 | /         | S17 |
| [Co(Me <sub>4</sub> cyclam)N <sub>3</sub> ]ClO <sub>4</sub>                 | CoN <sub>5</sub>                  | 0.48 | 20-60 | ≤ 0.2 | /         | /         | S18 |

## References

- S1 O. V. Dolomanov, L. J. Bourhis, R. J. Gildea, J. A. K. Howard and H. Puschmann, *J. Appl. Crystallogr.*, 2009, **42**, 339-341.
- S2 G. Peng, Y.-F. Qian, Z.-W. Wang, Y. Chen, T. Yadav, K. Fink, X.-M. Ren, *Cryst. Growth Des.*, 2021, **21**, 1035-1044.
- S3 G. Peng, Y. Chen, B. Li, Y.-Q. Zhang and X.-M. Ren, *Dalton Trans.*, 2020, **49**, 5798-5802.
- S4 A. Buchholz, A. O. Eseola and W. Plass, *C. R. Chim.*, 2012, **15**, 929-936.
- S5 S. Ziegenbalg, D. Hornig, H. Görls and W. Plass, *Inorg. Chem.*, 2016, **55**, 4047-4058.
- S6 D.-K. Cao, J.-Q. Feng, M. Ren, Y.-W. Gu, Y. Song and M. D. Ward, *Chem. Commun.*, 2013, **49**, 8863-8865.
- S7 D. K. Cao, R. H. Wei, X. X. Li and Y. W. Gu, *Dalton Trans.*, 2015, **44**, 5755-5762.
- S8 M. Böhme, S. Ziegenbalg, A. Aliabadi, A. Schnegg, H. Görls and W. Plass,

- Dalton Trans.*, 2018, **47**, 10861-10873.
- S9 R. Mitsuhashi, S. Hosoya, T. Suzuki, Y. Sunatsuki, H. Sakiyama and M. Mikuriya, *Dalton Trans.*, 2019, **48**, 395-399.
- S10 C. Rajnák, J. Titiš, J. Miklovič, G. E. Kostakis, O. Fuhr, M. Ruben and R. Boča, *Polyhedron*, 2017, **126**, 174-183.
- S11 F. Habib, O. R. Luca, V. Vieru, M. Shiddiq, I. Korobkov, S. I. Gorelsky, M. K. Takase, L. F. Chibotaru, S. Hill, R. H. Crabtree and M. Murugesu, *Angew. Chem., Int. Ed.*, 2013, **52**, 11290-11293.
- S12 I. Nemeč, H. Liu, R. Herchel, X. Zhang and Z. Trávníček, *Synth. Met.*, 2016, **215**, 158-163.
- S13 A. Switlicka, B. Machura, M. Penkala, A. Bienko, D. C. Bienko, J. Titis, C. Rajnak, R. Boca, A. Ozarowski and M. Ozerov, *Inorg. Chem.*, 2018, **57**, 12740-12755.
- S14 I. Nemeč, R. Herchel and Z. Travnicek, *Dalton Trans.*, 2016, **45**, 12479-12482.
- S15 B. Brachnakova, S. Matejová, J. Moncol, R. Herchel, J. Pavlik, E. Moreno-Pineda, M. Ruben and I. Salitros, *Dalton Trans.*, 2020, **49**, 1249-1264.
- S16 I. Nemeč, R. Marx, R. Herchel, P. Neugebauer, J. van Slagerenb and Z. Trávníček, *Dalton Trans.*, 2015, **44**, 15014-15021.
- S17 J. Vallejo, E. Pardo, M. Viciano-Chumillas, I. Castro, P. Amorós, M. Déniz, C. Ruiz-Pérez, C. Yuste-Vivas, J. Krzystek, M. Julve, F. Lloret and J. Cano, *Chem. Sci.*, 2017, **8**, 3694-3702.
- S18 B. Cahier, M. Perfetti, G. Zakhia, D. Naoufal, F. El-Khatib, R. Guillot, E. Rivière, R. Sessoli, A. L. Barra, N. Guihéry and T. Mallah, *Chem. – Eur. J.*, 2017, **23**, 3648-3657.
